# Supplementary material for: Single Cell Confocal Raman Spectroscopy of Human Osteoarthritic Chondrocytes: A Preliminary Study
Source: PubMed Central journal article supplement (PMC4463591; doi:10.3390/ijms16059341), 2015-04-24
Supplement: ijms-16-09341-s001.pdf [file ijms-16-09341-s001.pdf]

## Supplementary Information

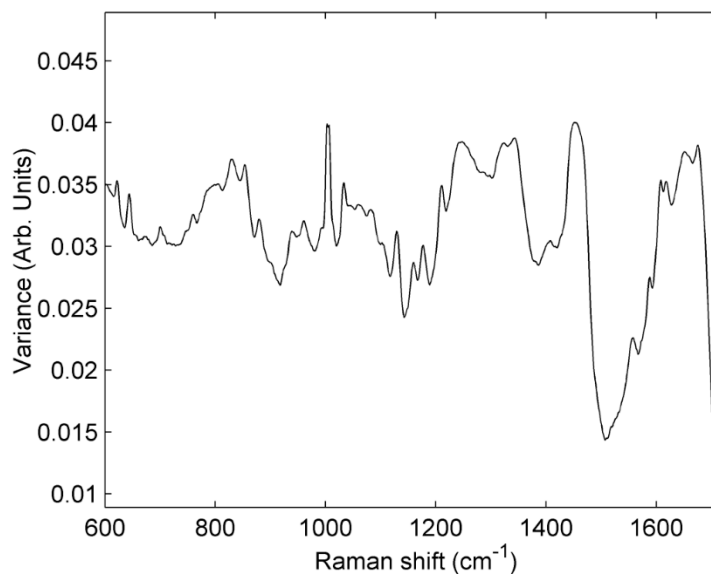

**Figure S1.** Plot of variance, between the 3 cell types, at each wavelength position of the Raman spectrum.

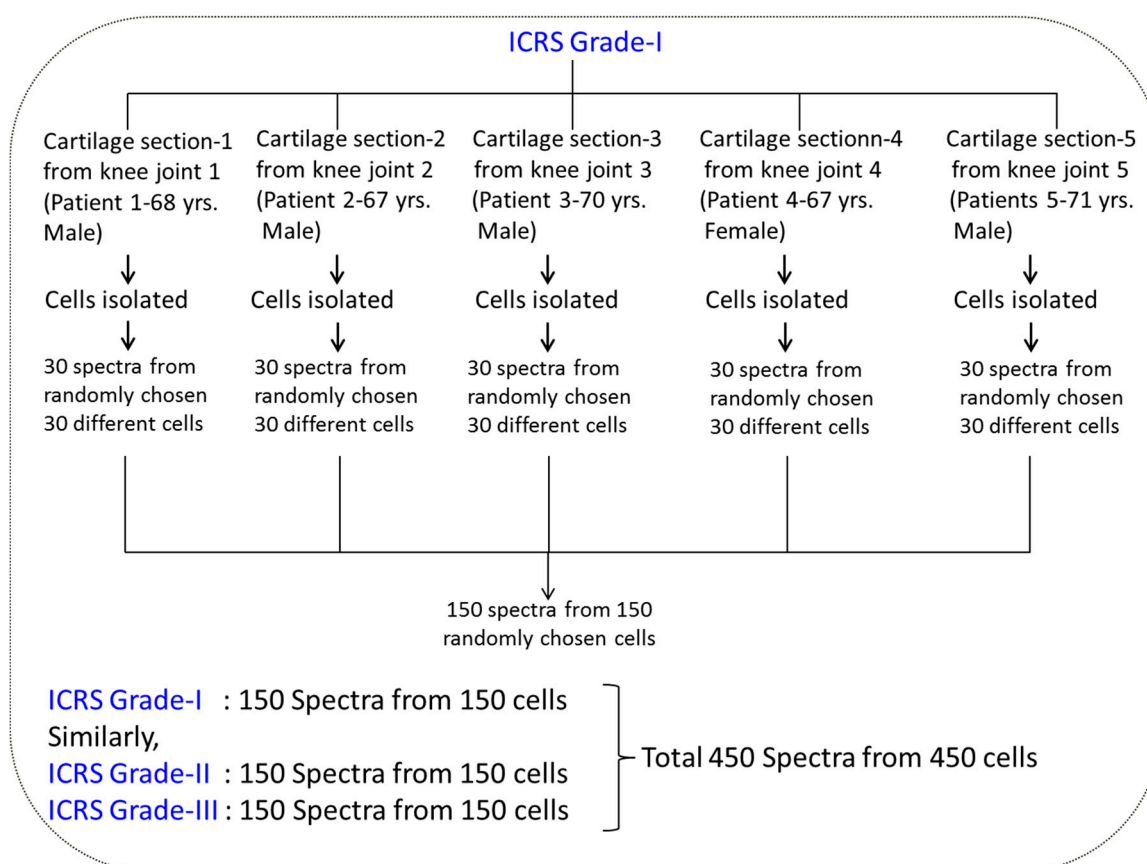

**Figure S2.** Classification of samples and acquisition of Raman spectra.

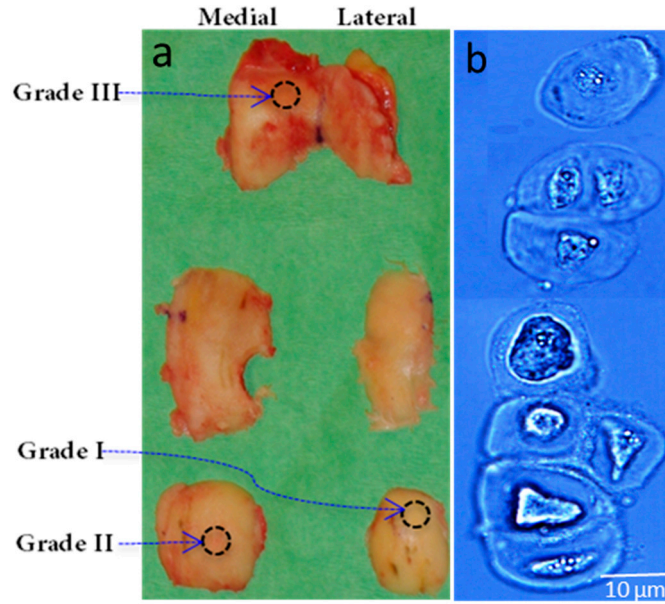

**Figure S3.** A typical image of (a) the representative area of osteoarthritic (ICRS Grade I, II and III) cartilage sections and (b) the representative bright-field micrographs of isolated human chondrocytes (cells) obtained from osteoarthritic (ICRS Grade-I) cartilage.

**Table S1.** ICRS grading based on the Outbridge score [38,39].

| Grade | Property                                                                              |
|-------|---------------------------------------------------------------------------------------|
| I     | Soft indentation, superficial lesions, fissures and cracks                            |
| II    | Fraying, lesions extending down to <50% of cartilage depth                            |
| III   | Cartilage defects extending down >50% of cartilage depth, loss of cartilage thickness |
| IV    | Complete loss of cartilage thickness, bone only                                       |
